# Supplementary material
Source: Research Square preprint supplement (doi:10.21203/rs.3.rs-9042590/v1)
Supplement: Supplementary file 1 [file dc1062336ede885f9c2a60e3.docx]

**Table S1.** Baseline characteristics, operative information, and postoperative Complications.

|  | Stent duration | | *P* value |
| --- | --- | --- | --- |
|  | ≤ 30 days  (n = 228) | > 30 days (n = 114) |
| Antiplatelet therapy, n (%) | 28 (12.3) | 18 (15.8) | 0.37 |
| Anticoagulant therapy, n (%) | 3 (1.3) | 1 (0.9) | 0.72 |
| Cold ischemic time (minutes), mean ± SD | 764.8 ± 501.5 | 847.0 ± 392.5 | 0.10 |
| Vascular anastomosis time (minutes), mean ± SD | 43.0 ± 10.0 | 42.9 ± 13.1 | 0.96 |
| Estimated blood loss (mL), mean ± SD | 291.6 ± 293.8 | 258.1 ± 164.8 | 0.26 |
| Ureteral stent culture status, n (%) |  |  |  |
| Negative | 78 (34.2) | 48 (42.1) | 0.56 |
| Positive | 54 (23.7) | 19 (16.7) |  |
| Escherichia coli | 10 (4.4) | 2 (1.7) |  |
| Klebsiella pneumoniae | 4 (1.8) | 0 |  |
| Proteus mirabilis | 2 (0.9) | 0 |  |
| Pseudomonas aeruginosa | 1 (0.4) | 1 (0.9) |  |
| Enterococcus faecalis | 5 (2.2) | 1 (0.9) |  |
| Morganella morganii | 1 (0.4) | 0 |  |
| Enterococcus faecium | 1 (0.4) | 0 |  |
| Mixed bacteria | 8 (3.5) | 6 (5.3) |  |
| Microbiota | 2 (0.9) | 0 |  |
| Other | 11 (4.8) | 4 (3.5) |  |
| ≥ 2 organism | 9 (3.9) | 5 (4.4) |  |
| Not evaluated | 96 (42.1) | 47 (41.2) |  |
| Complicated UTI (n,%) | 26 (11.4) | 19 (16.7) | 0.36 |
| IV antibiotics required | 12 (5.3) | 10 (8.8) |  |
| Hospital admission required | 4 (1.8) | 5 (4.4) |  |
| Sepsis | 9 (3.9) | 3 (2.6) |  |
| Septic shock | 1 (0.4) | 1 (0.9) |  |
